# Supplementary material for: Integrated characterization of SARS-CoV-2 genome, microbiome, antibiotic resistance and host response from single throat swabs
Source: Springer Nature journal article supplement (doi:10.1038/s41421-021-00248-3), 2021-03-30
Supplement: 41421_2021_248_MOESM1_ESM.pdf [file 41421_2021_248_MOESM1_ESM.pdf]

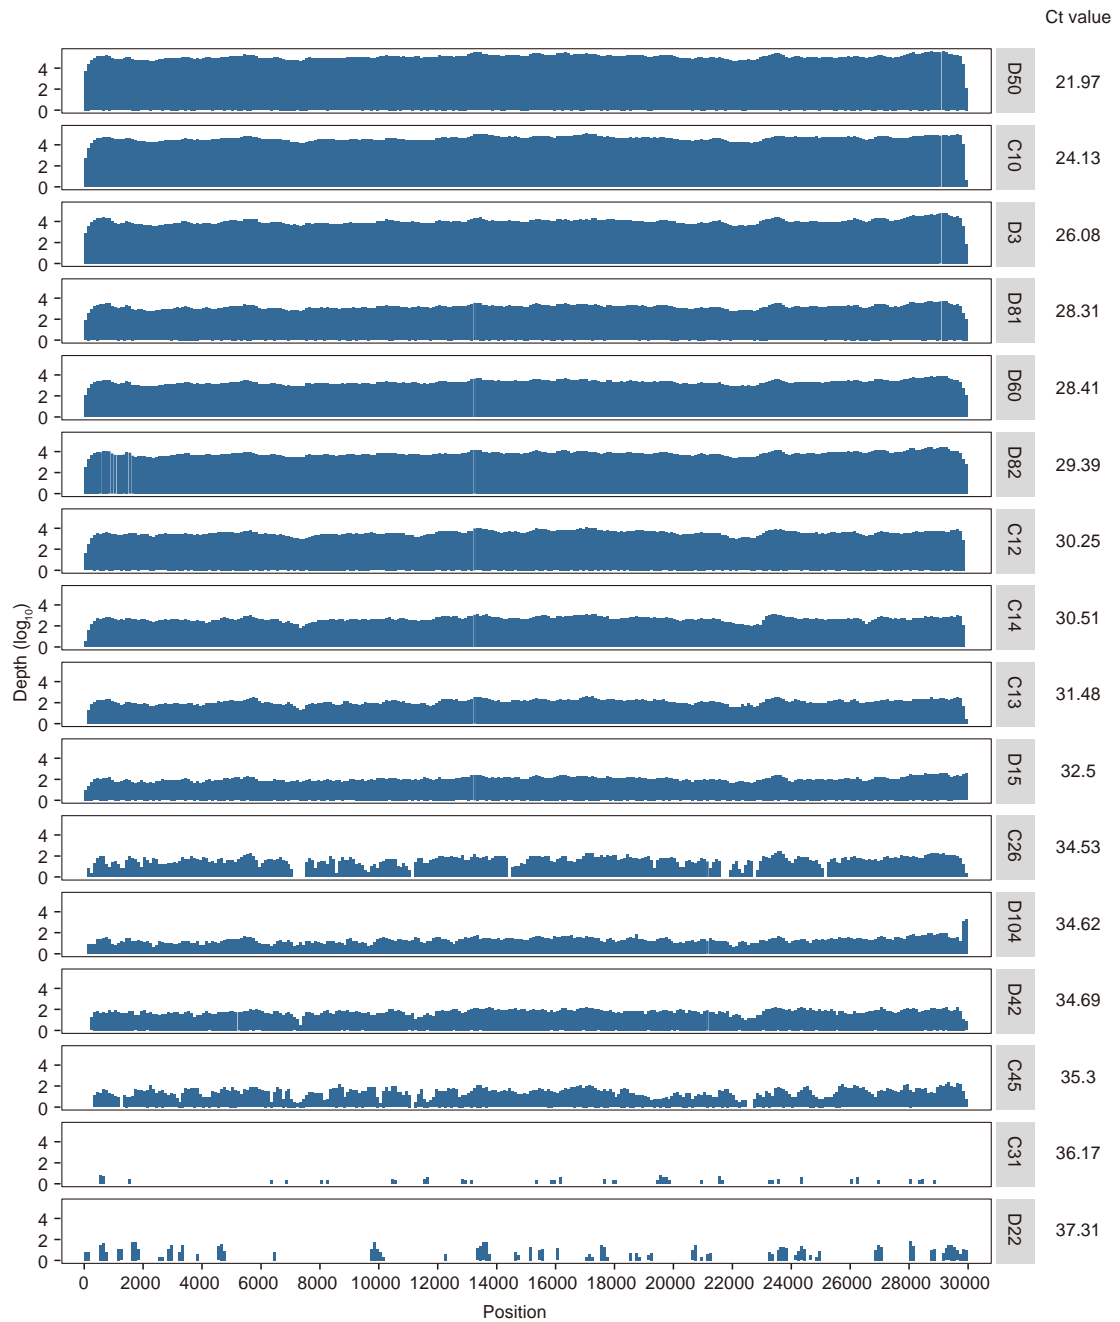

**Supplementary Fig. S1 Genome coverage and sequencing depth of SARS-CoV-2 in each sample.** The x axis represents the location of SARS-CoV-2 genome, and the y axis represents the log<sub>10</sub> depth of every 100 bp of slide window. The samples are arranged from top to bottom according to Ct values, as shown on the right panel.



in low SARS-CoV-2 viral load samples compared to negative samples. **d**  
Heatmap showing all genes up-regulated in high SARS-CoV-2 viral load  
samples compared to negative samples.

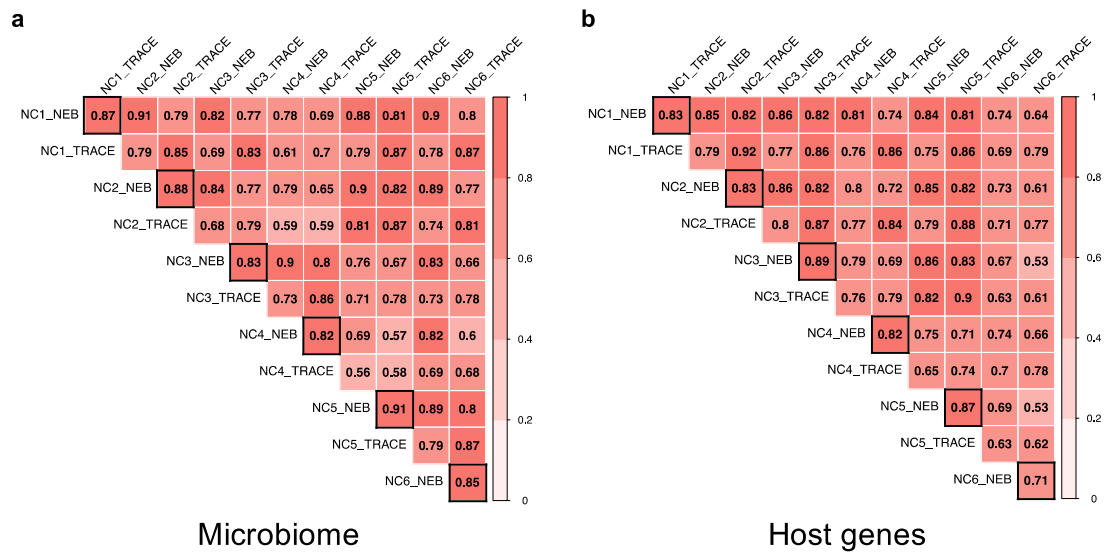

**Supplementary Fig. S3 Comparison of the performance of TRACE-seq and NEBNext Ultra II RNA kit on microbiome and host transcriptome profiling. a, b** Pearson correlation heatmap of TRACE-seq and NEBNext Ultra II RNA kit sequencing data in terms of microbial community structures (a), and host gene expression levels (b).

**Supplementary Table S1. Mapping results of SARS-CoV-2 for each sample.**

| Sample | Ct value | Total reads | SARS-CoV-2 reads | Mapping length (bp) | Average depth | Median depth |
|--------|----------|-------------|------------------|---------------------|---------------|--------------|
| D50    | 21.97    | 42,084,470  | 33,275,395       | 29,903              | 129,900.70    | 115,569      |
| C10    | 24.13    | 27,707,635  | 9,770,670        | 29,903              | 44,065.68     | 41,608       |
| D3     | 26.08    | 45,408,518  | 3,351,784        | 29,903              | 12,810.78     | 10,407       |
| D81    | 28.31    | 56,421,340  | 464,316          | 29,903              | 1,660.15      | 1,512        |
| D60    | 28.41    | 46,154,092  | 617,330          | 29,903              | 2,129.78      | 1,891        |
| D82    | 29.39    | 68,776,916  | 2,318,220        | 29,903              | 7,396.49      | 6,554        |
| C12    | 30.25    | 38,439,824  | 831,304          | 29,903              | 3,983.94      | 3,530        |
| C14    | 30.51    | 16,691,298  | 101,478          | 29,862              | 493.53        | 447          |
| C13    | 31.48    | 31,118,799  | 32,108           | 29,827              | 141.88        | 131          |
| D15    | 32.5     | 43,935,756  | 35,525           | 29,896              | 123.32        | 106          |
| C26    | 34.52    | 38,421,258  | 11,456           | 28,232              | 54.20         | 46           |
| D104   | 34.62    | 85,901,880  | 10,997           | 29,814              | 28.30         | 21           |
| D42    | 34.69    | 24,343,922  | 17,482           | 29,679              | 71.00         | 66           |
| C45    | 35.3     | 43,891,267  | 8,328            | 29,549              | 37.99         | 27           |
| C31    | 36.17    | 31,491,439  | 150              | 8,035               | 0.69          | 0            |
| D22    | 37.31    | 33,458,614  | 1,252            | 7,134               | 4.48          | 0            |

Ct: Cycle threshold.
